# Supplementary material
Source: PubMed Central journal article supplement (PMC3435195)
Supplement: 1207912109_pnas.201207912SI.pdf [file 1207912109_pnas.201207912SI.pdf]

# Supporting Information

Symersky et al. 10.1073/pnas.1207912109

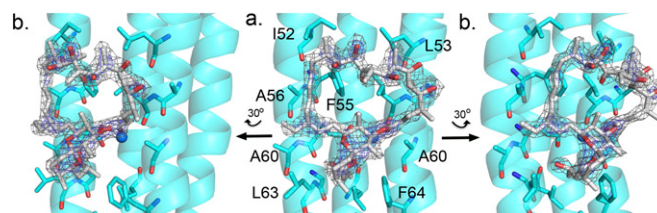

Fig. S1. Electron density map for oligomycin 1. (A) The electron density map (2Fo-Fc) is colored in gray (contoured at  $1.3\sigma$ ) and blue (contoured at  $2.0\sigma$ ). (B) As in A, but rotated  $30^\circ$  as indicated.

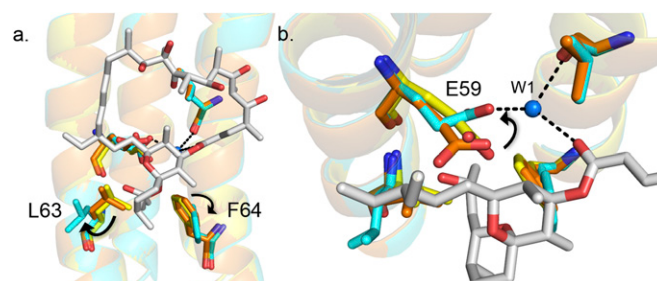

Fig. S2. Conformational changes caused by oligomycin binding. (A) Chains O and N for the oligomycin-bound structure (cyan) were superimposed onto chains D and C (yellow) (see Fig. 1) and also superimposed onto chains O and N from the structure of the c-ring without oligomycin (orange) (Protein Data Bank ID, 3UD0). (B) Top view of A showing the rotation of the side-chain carboxyl of Glu59 with oligomycin binding.

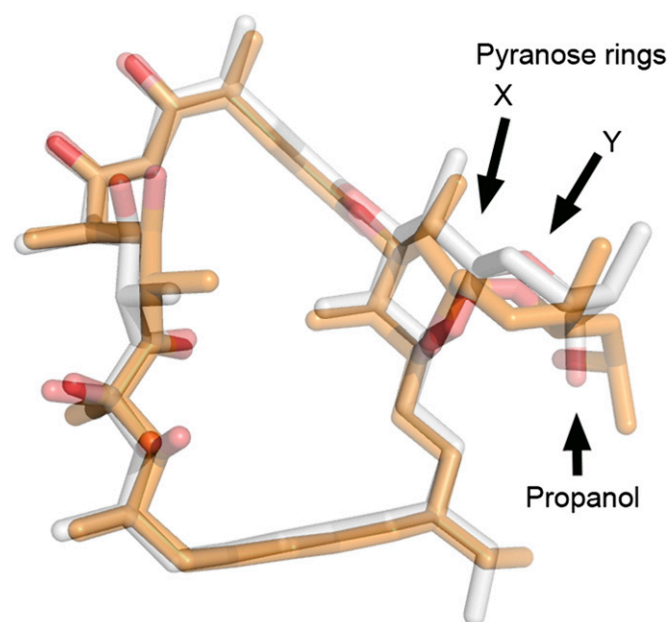

Fig. S3. Comparison of oligomycin 1 with the crystal structure of oligomycin. The crystal structure of oligomycin 1 is shown in gray and that of oligomycin A is in orange. Oligomycin consists of a 26-member macrocyclic ring with spiro-linked pyranose rings, labeled "X" and "Y." The structure of the macrocyclic ring is nearly identical in oligomycin 1 and oligomycin A. The greatest differences are in the pyranose rings where the propanol group interacts with Leu63 and Phe64.

**Table S1. Data collection and refinement statistics from a single crystal**

|                                           |                    |
|-------------------------------------------|--------------------|
| Data collection                           |                    |
| Space group                               | I4 <sub>1</sub> 22 |
| Cell dimensions                           |                    |
| a, b, c (Å)                               | 76.7, 76.7, 488.2  |
| α, β, γ (°)                               | 90.0, 90.0, 90.0   |
| Resolution (Å)                            | 30–1.9 (1.97–1.9)* |
| R <sub>merge</sub>                        | 0.084 (0.652)      |
| I / σI                                    | 20.8 (1.8)         |
| Completeness (%)                          | 98.1 (90.6)        |
| Redundancy                                | 20.8 (1.8)         |
| Matthews coefficient (Å <sup>3</sup> /Da) | 2.11               |
| Solvent content (%)                       | 41.6               |
| Refinement                                |                    |
| Resolution (Å)                            | 30–1.9 (1.95–1.9)  |
| No. reflections                           | 53035              |
| R <sub>work</sub> / R <sub>free</sub>     | 0.202/0.228        |
| No. atoms                                 |                    |
| Protein                                   | 5,494              |
| Ligand                                    | 392                |
| Water                                     | 150                |
| B-factors (Å <sup>2</sup> )               |                    |
| Protein                                   | 26.0               |
| Ligand                                    | 41.3               |
| Water                                     | 34.2               |
| Average                                   | 26.8               |
| rms deviations                            |                    |
| Bond lengths (Å)                          | 0.010              |
| Bond angles (°)                           | 1.181              |
| Ramachandran most favored (%)             | 97.2               |
| Ramachandran additional (%)               | 2.8                |
| No. c-subunits per asymmetrical unit      | 10                 |

\*Values in parentheses are for highest-resolution shell.

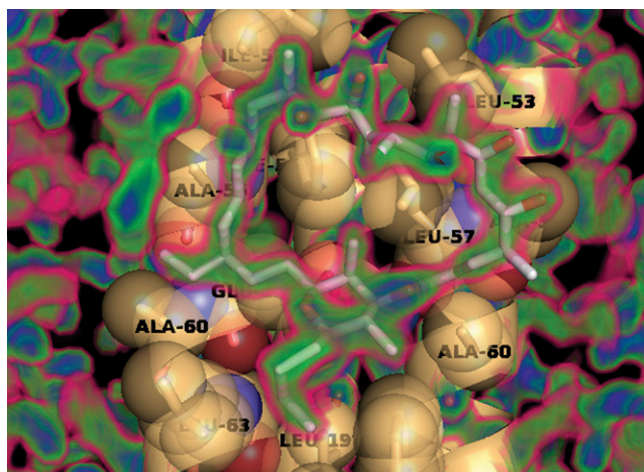

**Movie S1.** Electron density map for oligomycin 1 using a volume representation. The 2Fo-Fc map is shown colored as a gradient as shown below.

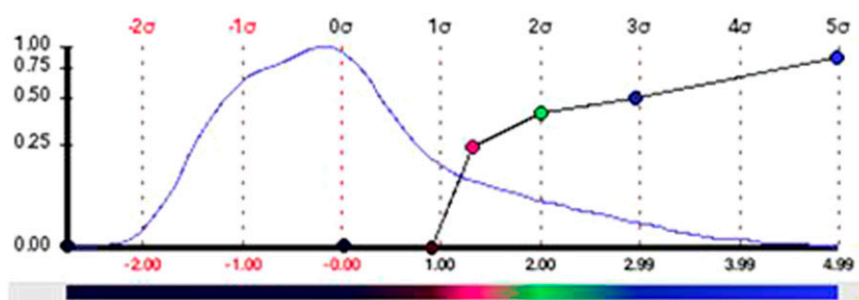

[Movie S1](#)

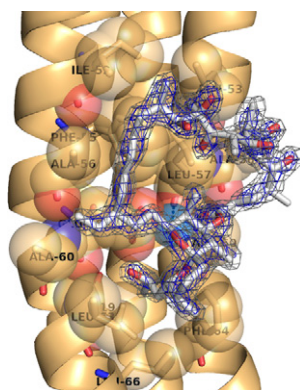

**Movie S2.** Binding site for oligomycin 1 with electron density for 2Fo-Fc contoured at 1.3 $\sigma$  (gray mesh) and 2.0 $\sigma$  (blue mesh).

[Movie S2](#)
